# Supplementary material
Source: HighWire-hosted journal article supplement (https://www.ajnr.org/highwire/filestream/71848/field_highwire_adjunct_files/0/19-00835.pdf)
Supplement: 19-00835.pdf [file 19-00835.pdf]

**On-line Table: Summary of imaging and clinical findings in patients with abnormally decreased parenchymal T2 signal**

| Case | Sex | Age (yr) | Side          | Location                                | Seizures/<br>Altered LOC | Other Clinical Information                                                     | DWI    | SWI/<br>GRE | Imaging F/<br>U (mo) | Evolution of<br>Changes           | EEG Changes<br>Corresponded<br>To Side? | EEG Comments                                                                                                                                                  |
|------|-----|----------|---------------|-----------------------------------------|--------------------------|--------------------------------------------------------------------------------|--------|-------------|----------------------|-----------------------------------|-----------------------------------------|---------------------------------------------------------------------------------------------------------------------------------------------------------------|
| 1    | F   | 33       | Bilateral     | Following frontal, parietal             | Generalized seizures     | Inpatient; post-cardiac arrest                                                 | ↓      | ↓           | No                   | NA                                | Yes                                     | Bilateral PLED changes suggestive of controlled seizures                                                                                                      |
| 2    | M   | 44       | Unilateral, R | Following temporal, parietal, occipital | Generalized seizures     | Inpatient; previous childhood medullo-blastoma with radiotherapy               | ↓      | ↓           | 72                   | Resolved                          | Yes                                     | Focal slow-wave activity seen over right hemisphere likely representing subcortical dysfunction                                                               |
| 3    | F   | 80       | Unilateral, L | Frontal, temporal, parietal             | Generalized seizures     | Inpatient; acute subdural hematoma, subsequent seizures                        | ↓      | Normal      | No                   | NA                                | Yes                                     | Active focal interictal epileptiform abnormalities throughout left side, indicative of cortical irritability; also changes involving subcortical white matter |
| 4    | M   | 49       | Unilateral, R | Frontal                                 | No                       | Outpatient, asymptomatic, changes adjacent to an incidentally found meningioma | ↓      | ↓           | 24                   | Resolved after meningioma treated |                                         | NA                                                                                                                                                            |
| 5    | M   | 65       | Unilateral, L | Frontal, temporal, parietal             | No                       | Inpatient; subdural hematoma following meningioma resection                    | ↓      | ↓           | 30                   | Resolved after meningioma treated |                                         | NA                                                                                                                                                            |
| 6    | F   | 46       | Unilateral, L | Parietal, temporal, occipital           | Generalized seizures     | Inpatient; admitted with new seizures                                          | Normal | ↓           | 18                   | Gliosis                           | Yes                                     | Active focal interictal epileptiform abnormalities involving left posterior temporal region, supporting an underlying seizure focus                           |
| 7    | F   | 48       | Unilateral, R | Parietal, occipital, temporal           | Generalized seizures     | Inpatient; meningioma resection with postop subdural hematoma                  | ↓      | ↓           | 18                   | Persistent ↓ T2/FLAIR signal      | Yes                                     | Complex partial seizures involving right occipital lobe with spread to right posterior temporal region                                                        |
| 8    | M   | 18       | Bilateral     | Frontal, temporal, parietal, occipital  | Generalized seizures     | Inpatient; chronic epilepsy                                                    | ↓      | ↓           | No                   | NA                                | Yes                                     | Severe generalized nonepileptiform disturbances compatible with a diffuse severe encephalopathy                                                               |
| 9    | M   | 62       | Bilateral     | Frontal, temporal, parietal, occipital  | Generalized seizures     | Inpatient; seizing following cardiac arrest                                    | ↓      | ↓           | No                   | NA                                | Yes                                     | Diffuse severe density of brain activity                                                                                                                      |

*Continued on next page*

**On-line Table: Continued**

| Case | Sex | Age (yr) | Side          | Location                               | Seizures/<br>Altered LOC | Other Clinical<br>Information                                                                       | DWI | SWI/<br>GRE | Imaging F/<br>U (mo) | Evolution of<br>Changes      | EEG Changes<br>Corresponded<br>To Side? | EEG Comments                                                                                               |
|------|-----|----------|---------------|----------------------------------------|--------------------------|-----------------------------------------------------------------------------------------------------|-----|-------------|----------------------|------------------------------|-----------------------------------------|------------------------------------------------------------------------------------------------------------|
| 10   | M   | 46       | Unilateral, L | Frontal                                | Generalized seizures     | Inpatient; increased seizures in patient with anaplastic oligodendroglioma                          | ↓   | Normal      | 5                    | Persistent ↓ T2 FLAIR signal | Yes                                     | Seizure activity in left frontal lobe                                                                      |
| 11   | M   | 45       | Unilateral, L | Occipital, temporal                    | Focal seizures           | Inpatient; focal occipital (visual) seizures                                                        | ↓   | Normal      | No                   | NA                           | Yes                                     | Seizure activity in left occipital lobe                                                                    |
| 12   | M   | 47       | Unilateral, R | Occipital, temporal                    | Focal seizures           | Inpatient; focal occipital (visual) seizures, previous childhood medullo-blastoma with radiotherapy | ↓   | ↓           | No                   | NA                           | Yes                                     | Focal slow-wave activity in right occipital lobe                                                           |
| 13   | M   | 48       | Unilateral, L | Frontal, temporal, parietal, occipital | Generalized seizures     | Inpatient; acute subdural hematoma, evacuated with subsequent seizures                              | ↓   | ↓           | No                   | NA                           | Yes                                     | Slow-wave activity in left frontal and parietal lobes                                                      |
| 14   | M   | 71       | Bilateral     | Occipital                              | Generalized seizures     | Inpatient; brain mets, sarcoma primary                                                              | ↓   | ↓           | No                   | NA                           | Yes                                     | Diffusely abnormal, with slowing and low-amplitude activity                                                |
| 15   | M   | 48       | Unilateral, R | Occipital, parietal                    | Generalized seizures     | Inpatient; admitted with new seizures                                                               | ↓   | ↓           | No                   | NA                           |                                         | NA                                                                                                         |
| 16   | F   | 33       | Unilateral, L | Occipital, temporal                    | Generalized seizures     | Inpatient; seizures after liver transplant                                                          | ↓   | ↓           | No                   | NA                           |                                         | NA                                                                                                         |
| 17   | M   | 68       | Unilateral, L | Frontal, parietal, temporal            | Altered LOC              | Inpatient; subdural hematoma after meningioma resection                                             | ↓   | ↓           | No                   | NA                           |                                         | NA                                                                                                         |
| 18   | M   | 68       | Bilateral     | Occipital, temporal                    | Altered LOC              | Inpatient; altered LOC after cardiac arrest                                                         | ↓   | ↓           | No                   | NA                           | Yes                                     | Diffuse nonepileptiform signal alteration and slowing affecting cortical gray and subcortical white matter |
| 19   | F   | 69       | Unilateral, L | Parietal, frontal                      | Altered LOC              |                                                                                                     | ↓   | ↓           | No                   | NA                           | Yes                                     |                                                                                                            |

*Continued on next page*

**On-line Table: Continued**

| Case | Sex | Age (yr) | Side          | Location                                        | Seizures/<br>Altered LOC | Other Clinical<br>Information                                                                                                                                   | DWI | SWI/<br>GRE | Imaging F/<br>U (mo) | Evolution of<br>Changes | EEG Changes<br>Corresponded<br>To Side? | EEG Comments                                                                                                                                                                                      |
|------|-----|----------|---------------|-------------------------------------------------|--------------------------|-----------------------------------------------------------------------------------------------------------------------------------------------------------------|-----|-------------|----------------------|-------------------------|-----------------------------------------|---------------------------------------------------------------------------------------------------------------------------------------------------------------------------------------------------|
|      |     |          |               |                                                 |                          | Inpatient; acute<br>subdural                                                                                                                                    |     |             |                      |                         |                                         | Left-sided dysfunction of<br>cerebral activity                                                                                                                                                    |
| 20   | F   | 85       | Unilateral, R | Frontal                                         | Focal seizures           | hematoma<br>Outpatient,<br>meningioma with<br>worsening<br>complex partial<br>seizures                                                                          | ↓   | ↓           | No                   | NA                      |                                         | NA                                                                                                                                                                                                |
| 21   | M   | 52       | Unilateral, R | Frontal,<br>temporal,<br>parietal,<br>occipital | Generalized<br>seizures  | Inpatient; chronic<br>epilepsy                                                                                                                                  | ↓   | ↓           | 12                   | Resolved                |                                         | NA                                                                                                                                                                                                |
| 22   | M   | 79       | Unilateral, R | Frontal,<br>temporal,<br>occipital              | Focal seizures           | Inpatient; acute<br>subdural<br>hematoma,<br>subsequent focal<br>seizures                                                                                       | ↓   | ↓           | No                   | NA                      | Yes                                     | Slowing and suppression on the<br>side of the SDH/FLAIR changes                                                                                                                                   |
| 23   | F   | 53       | Unilateral, R | Frontal,<br>temporal,<br>parietal               | No                       | Inpatient; acute<br>subdural<br>hematoma                                                                                                                        | ↓   | ↓           | 2                    | Resolved                |                                         | NA                                                                                                                                                                                                |
| 24   | F   | 56       | Unilateral, R | Frontal, parietal                               | No                       | Inpatient; acute<br>subdural<br>hematoma                                                                                                                        | ↓   | ↓           | No                   | NA                      |                                         | NA                                                                                                                                                                                                |
| 25   | F   | 18       | Bilateral     | Frontal                                         | Generalized<br>seizures  | hematoma<br>Inpatient; chronic<br>epilepsy                                                                                                                      | ↓   | ↓           | No                   | NA                      | Yes                                     | Severe bihemispheric<br>encephalopathy                                                                                                                                                            |
| 26   | M   | 30       | Unilateral, R | Frontal                                         | Generalized<br>seizures  | Inpatient; subdural<br>hematoma<br>following<br>craniotomy for<br>tumor resection;<br>T2 hypointense<br>changes were<br>not present on<br>pre-craniotomy<br>MRI | ↓   | ↓           | No                   | NA                      | Yes                                     | High-amplitude $\Delta$ frequency<br>slow-wave activity over entire<br>left hemisphere, indicating an<br>underlying structural<br>abnormality affecting<br>subcortical and cortical<br>structures |
| 27   | M   | 49       | Unilateral, L | Frontal                                         | Generalized<br>seizures  | Inpatient; acute<br>subdural<br>hematoma,<br>craniectomy,<br>subsequent<br>infection, seizing                                                                   | ↓   | ↓           | 1.25                 | Resolved                | Yes                                     | Slower waveforms throughout<br>left hemisphere                                                                                                                                                    |
| 28   | M   | 39       | Unilateral, R | Parietal                                        |                          |                                                                                                                                                                 | ↓   | ↓           | No                   | NA                      |                                         | NA                                                                                                                                                                                                |

*Continued on next page*

**On-line Table: Continued**

| Case | Sex | Age (yr) | Side      | Location          | Seizures/<br>Altered LOC | Other Clinical<br>Information                                                                                       | DWI | SWI/<br>GRE | Imaging F/<br>U (mo) | Evolution of<br>Changes | EEG Changes<br>Corresponded<br>To Side? | EEG Comments                                                                                                                     |
|------|-----|----------|-----------|-------------------|--------------------------|---------------------------------------------------------------------------------------------------------------------|-----|-------------|----------------------|-------------------------|-----------------------------------------|----------------------------------------------------------------------------------------------------------------------------------|
| 29   | M   | 84       | Bilateral | Frontal, parietal | Generalized seizures     | Inpatient, venous thrombosis following DAVF embolization, seizures<br>Inpatient, bilateral acute subdural hematomas | ↓   | ↓           | No                   | NA                      | Yes                                     | Moderate-to-severe bilateral waveform disturbances, indicative of a diffuse process affecting cortical and subcortical functions |

**Note:**—LOC indicates level of consciousness; F/U, follow-up; NA, not applicable; ↓, decreased; L, left; R, right; PLED, periodic lateralized epileptiform discharges; SDH, subdural hematoma; DAVF, dural arteriovenous fistula; postop, postoperative; mets, metastases.
